# Supplementary material
Source: PubMed Central journal article supplement (PMC1933463)

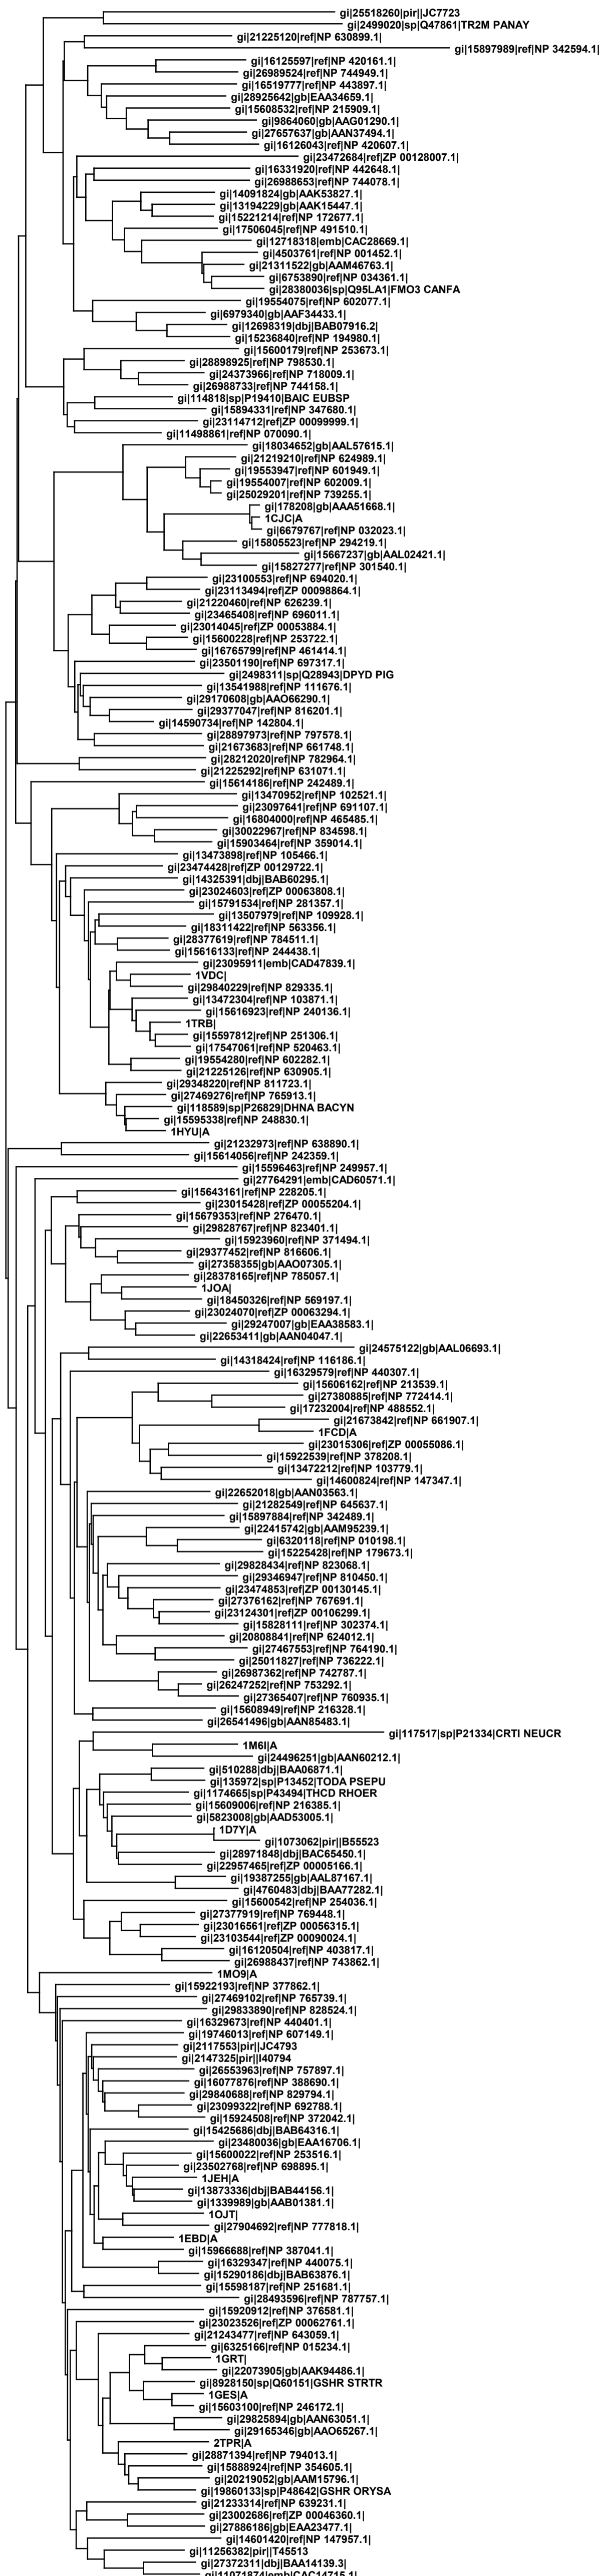

Supplement: pcbi.0030121.sg001.pdf [file pcbi.0030121.sg001.pdf]
